# Supplementary material for: Biochemical and molecular characterization of 3-Methylcrotonylglycinuria in an Italian asymptomatic girl
Source: PubMed Central journal article supplement (PMC6082241; doi:10.1590/1678-4685-gmb-2017-0093), 2018-05-14
Supplement: 1415-4757-GMB-10159016784685GMB20170093-s001.pdf [file 1415-4757-GMB-10159016784685GMB20170093-s001.pdf]

## Supplementary Material to “Biochemical and molecular characterization of 3-Methylcrotonylglycinuria in an Italian asymptomatic girl”

**Table S1** - Summary of bioinformatics analysis using the Alamut software. Square brackets show the score range for each algorithm, when applicable.

| Nucleotide variation cDNA | Aminoacid variation protein | POLYPHEN-2 [0;1]§ | SIFT [0;1]* | Mutation Taster | Splice Site Finder (0–100) |     | Max Ent Scan (0–16) |     | NNSPLICE (0–1) |     | Gene Splicer (0–15) |     | Human Splicing Finder (0–100) |     | Alamut Predicted Change           |
|---------------------------|-----------------------------|-------------------|-------------|-----------------|----------------------------|-----|---------------------|-----|----------------|-----|---------------------|-----|-------------------------------|-----|-----------------------------------|
|                           |                             |                   |             |                 | WT                         | MUT | WT                  | MUT | WT             | MUT | WT                  | MUT | WT                            | MUT |                                   |
| c.691A>T                  | p.I231F                     | 0.986             | 0.01        | Disease causing | NA                         | NA  | NA                  | NA  | NA             | NA  | NA                  | NA  | NA                            | NA  | Variant of uncertain significance |
| c.1150-1G>A               | NA                          | NA                | NA          | NA              | 91.37                      | —   | 7.91                | —   | 0.99           | —   | 5.11                | —   | 84.62                         | —   | Acceptor splice site: -100%       |

§: the higher the value, the higher the probability of pathogenicity; \*: probability of observing the new amino acid at that position, a value of between 0 and 0.05 is predicted to affect protein function. NA: Not Applicable; —: splice site not detected.
